# Supplementary material for: The role of oxygen and water on molybdenum nanoclusters for electro catalytic ammonia production
Source: publisher site journal article supplement (doi:10.3762/bjnano.5.11), 2014-01-31
Supplement: Additional file 1 [file 2190-4286-5-11-S1.pdf]

# Supporting Information

for

## The role of oxygen and water on molybdenum

## nanoclusters for electro catalytic ammonia production

Jakob G. Howalt<sup>1,2</sup> and Tejs Vegge<sup>\*1</sup>

Address: <sup>1</sup>Department of Energy Conversion and Storage, Technical University of Denmark, DK-4000 Roskilde, Denmark and <sup>2</sup>Center for Atomic-scale Materials Design, Department of Physics, Technical University of Denmark, DK-2800 Kgs. Lyngby, Denmark

Email: Tejs Vegge - teve@dtu.dk

\*Corresponding author

### Additional Figures

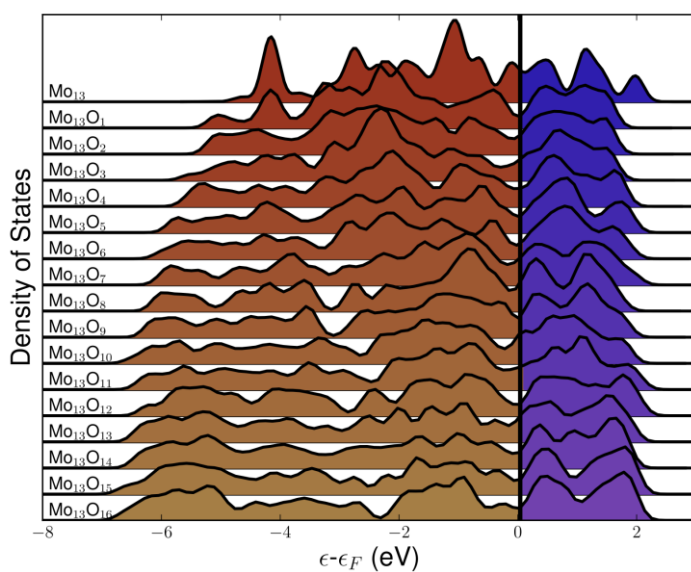

**Figure S1:** The d-band of molybdenum nanoclusters as the oxygen coverage evolves.

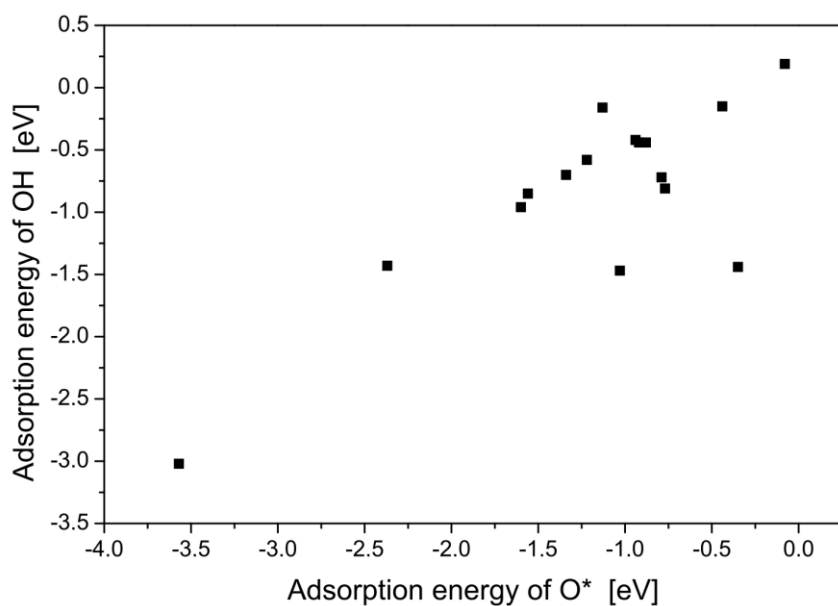

**Figure S2:** The adsorption energy of OH plotted as a function of adsorption energy of O for the oxygen covered molybdenum nanoclusters.

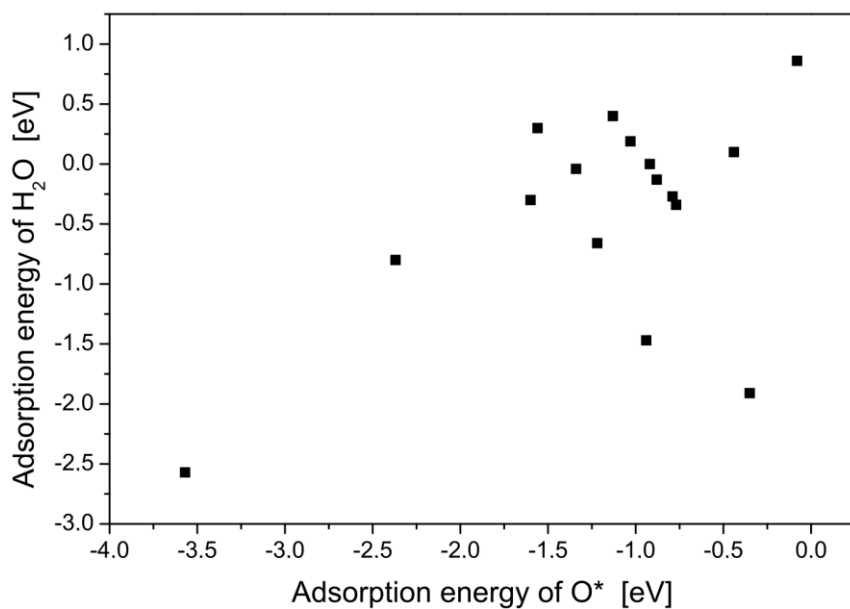

**Figure S3:** The adsorption energy of H<sub>2</sub>O plotted as a function of adsorption energy of O for the oxygen covered molybdenum nanoclusters.
